# Supplementary material
Source: Research Square preprint supplement (doi:10.21203/rs.3.rs-9449969/v1)
Supplement: Supplementary file 1 [file 89ea69f78dc84e13f71026cd.docx]

**Table S1**: Peak Analysis for HbO, HbR, and HbT

| Measure | Covariate(s) | MS | MSE | df1 | df2 | F | p | η²p [90% CI] | η²G |
| --- | --- | --- | --- | --- | --- | --- | --- | --- | --- |
| Peak HbO | Group | 0.003 | 0.031 | 1 | 55 | 0.090 | 0.766 | 0.002 [0.000, 0.055] | 0.000 |
|  | ROI | 0.064 | 0.009 | 9 | 495 | 6.937 | < .001 | *** | 0.084 |
|  | Group * ROI | 0.007 | 0.009 | 9 | 495 | 0.782 | 0.633 | 0.014 [0.000, 0.016] | 0.010 |
| Peak HbR | Group | 0.036 | 0.007 | 1 | 55 | 4.947 | 0.030 | * | 0.019 |
|  | ROI | 0.007 | 0.003 | 9 | 495 | 2.378 | 0.012 | * | 0.033 |
|  | Group * ROI | 0.004 | 0.003 | 9 | 495 | 1.229 | 0.275 | 0.022 [0.000, 0.029] | 0.017 |
| Peak HbT | Group | 0.051 | 0.024 | 1 | 55 | 2.108 | 0.152 | 0.037 [0.000, 0.149] | 0.009 |
|  | ROI | 0.028 | 0.009 | 9 | 495 | 3.006 | 0.002 | ** | 0.041 |
|  | Group * ROI | 0.010 | 0.009 | 9 | 495 | 1.039 | 0.407 | 0.019 [0.000, 0.024] | 0.014 |

*Note*. MSE = Mean Square Error.

**Table S2:** T Peak Analysis for HbO, HbR, and HbT

| Measure | Covariate(s) | MS | MSE | df1 | df2 | F | p | η2p [90% CI] | η2G |
| --- | --- | --- | --- | --- | --- | --- | --- | --- | --- |
| HbO | – | 0.847 | 98.337 | 1 | 55 | 0.009 | .926 | .000 [.000, .014] | .000 |
|  | group | 65.090 | 26.281 | 9 | 495 | 2.477 | .009 | .043 [.006, .060] | .031 |
|  | group * roi | 41.906 | 26.281 | 9 | 495 | 1.595 | .114 | .028 [.000, .039] | .020 |
| HbR | – | 118.106 | 84.541 | 1 | 55 | 1.397 | .242 | .025 [.000, .127] | .006 |
|  | group | 21.460 | 28.084 | 9 | 495 | 0.764 | .650 | .014 [.000, .015] | .010 |
|  | group * roi | 23.097 | 28.084 | 9 | 495 | 0.822 | .596 | .015 [.000, .017] | .011 |
| HbT | – | 4.260 | 80.564 | 1 | 55 | 0.053 | .819 | .001 [.000, .045] | .000 |
|  | group | 46.914 | 23.799 | 9 | 495 | 1.971 | .041 | * .035 [.001, .048] | .025 |
|  | group * roi | 44.872 | 23.799 | 9 | 495 | 1.885 | .052 | .033 [.000, .046] | .024 |

*Note*. MSE = Mean Square Error.

**Table S3:** Descriptive statistics of fNIRS indices for each brain region (M ± SD)

| brain regions | Hb type | Group | Kslope (×10⁻⁴) | Mean | Peak | Sintegrate | T-Peak(s) |
| --- | --- | --- | --- | --- | --- | --- | --- |
| right dorsolateral brain | HbO | Low VitD | 0.001±0.001 | -0.002±0.021 | 0.125±0.156 | 3.215±4.892 | 26.812±5.321 |
|  | Normal vitD | 0.000±0.001 | -0.003±0.023 | 0.118±0.149 | 2.987±4.653 | 25.897±5.032 |
| HbR | Low VitD | -0.001±0.001 | -0.011±0.030 | 0.062±0.089 | 1.895±3.210 | 25.987±5.103 |
|  | Normal vitD | 0.000±0.001 | -0.009±0.028 | 0.058±0.082 | 1.765±3.012 | 25.124±4.896 |
| HbT | Low VitD | 0.000±0.001 | -0.013±0.028 | 0.093±0.112 | 2.563±4.015 | 26.325±5.214 |
|  | Normal vitD | -0.001±0.001 | -0.012±0.026 | 0.088±0.105 | 2.376±3.821 | 25.452±4.987 |
| Broca's right brain | HbO | Low VitD | 0.000±0.001 | -0.003±0.023 | 0.118±0.149 | 2.987±4.653 | 25.763±5.012 |
|  | Normal vitD | -0.001±0.001 | -0.004±0.024 | 0.112±0.145 | 2.876±4.532 | 24.986±4.815 |
| HbR | Low VitD | -0.001±0.001 | -0.009±0.028 | 0.058±0.082 | 1.765±3.012 | 25.124±4.896 |
|  | Normal vitD | 0.000±0.001 | -0.008±0.027 | 0.055±0.080 | 1.698±3.056 | 23.895±4.872 |
| HbT | Low VitD | -0.001±0.001 | -0.012±0.026 | 0.088±0.105 | 2.376±3.821 | 25.452±4.987 |
|  | Normal vitD | -0.001±0.001 | -0.013±0.027 | 0.083±0.102 | 2.287±3.794 | 24.032±4.956 |
| Right frontal pole | HbO | Low VitD | -0.001±0.001 | -0.001±0.020 | 0.132±0.161 | 3.452±5.013 | 28.214±5.596 |
|  | Normal vitD | 0.000±0.001 | -0.002±0.021 | 0.129±0.155 | 3.287±4.921 | 26.543±5.321 |
| HbR | Low VitD | 0.000±0.001 | -0.008±0.027 | 0.065±0.091 | 1.987±3.321 | 27.563±5.412 |
|  | Normal vitD | -0.001±0.001 | -0.007±0.026 | 0.061±0.086 | 1.876±3.245 | 26.543±5.218 |
| HbT | Low VitD | -0.001±0.001 | -0.009±0.025 | 0.098±0.118 | 2.721±4.156 | 27.892±5.503 |
|  | Normal vitD | -0.001±0.001 | -0.010±0.025 | 0.095±0.111 | 2.581±4.083 | 26.834±5.291 |
| Right temporal lobe | HbO | Low VitD | 0.000±0.001 | -0.004±0.022 | 0.085±0.103 | 2.156±3.542 | 24.653±4.789 |
|  | Normal vitD | -0.001±0.001 | -0.005±0.024 | 0.067±0.084 | 1.765±3.012 | 22.836±4.720 |
| HbR | Low VitD | -0.001±0.001 | -0.010±0.029 | 0.049±0.075 | 1.563±2.897 | 24.125±4.653 |
|  | Normal vitD | 0.000±0.001 | -0.011±0.030 | 0.042±0.068 | 1.452±2.789 | 22.365±4.567 |
| HbT | Low VitD | -0.001±0.001 | -0.014±0.027 | 0.067±0.089 | 1.859±3.215 | 24.387±4.721 |
|  | Normal vitD | -0.001±0.001 | -0.016±0.028 | 0.055±0.076 | 1.608±2.901 | 22.601±4.645 |
| Right brain motor area | HbO | Low VitD | 0.001±0.001 | -0.002±0.024 | 0.148±0.172 | 3.652±5.214 | 26.125±5.132 |
|  | Normal vitD | 0.000±0.001 | -0.003±0.025 | 0.131±0.158 | 3.321±4.987 | 25.364±4.921 |
| HbR | Low VitD | -0.001±0.001 | -0.007±0.026 | 0.045±0.064 | 1.653±2.987 | 25.364±4.987 |
|  | Normal vitD | 0.000±0.001 | -0.006±0.025 | 0.058±0.079 | 1.789±3.045 | 25.124±4.965 |
| HbT | Low VitD | 0.000±0.001 | -0.009±0.025 | 0.105±0.110 | 2.652±4.103 | 25.743±5.056 |
|  | Normal vitD | -0.001±0.001 | -0.007±0.024 | 0.124±0.159 | 2.842±4.203 | 25.555±5.102 |
| Left dorsolateral brain | HbO | Low VitD | 0.000±0.001 | -0.003±0.022 | 0.131±0.158 | 3.321±4.987 | 26.543±5.278 |
|  | Normal vitD | -0.001±0.001 | -0.004±0.023 | 0.118±0.149 | 2.987±4.653 | 25.789±5.014 |
| HbR | Low VitD | -0.001±0.001 | -0.012±0.031 | 0.063±0.088 | 1.925±3.189 | 25.876±5.045 |
|  | Normal vitD | 0.000±0.001 | -0.011±0.030 | 0.062±0.089 | 1.895±3.210 | 25.987±5.103 |
| HbT | Low VitD | -0.001±0.001 | -0.015±0.029 | 0.097±0.115 | 2.623±4.076 | 26.214±5.163 |
|  | Normal vitD | -0.001±0.001 | -0.013±0.028 | 0.093±0.112 | 2.563±4.015 | 26.325±5.214 |
| Broca's left brain | HbO | Low VitD | -0.001±0.001 | -0.004±0.023 | 0.112±0.145 | 2.876±4.532 | 24.174±5.489 |
|  | Normal vitD | 0.000±0.001 | -0.005±0.024 | 0.093±0.112 | 2.563±4.015 | 23.564±4.789 |
| HbR | Low VitD | 0.000±0.001 | -0.009±0.028 | 0.055±0.080 | 1.698±3.056 | 23.895±4.872 |
|  | Normal vitD | -0.001±0.001 | -0.010±0.029 | 0.049±0.075 | 1.563±2.897 | 24.125±4.653 |
| HbT | Low VitD | -0.001±0.001 | -0.013±0.027 | 0.083±0.102 | 2.287±3.794 | 24.032±4.956 |
|  | Normal vitD | -0.001±0.001 | -0.014±0.027 | 0.067±0.089 | 1.859±3.215 | 24.387±4.721 |
| left frontal pole | HbO | Low VitD | 0.000±0.001 | -0.002±0.021 | 0.129±0.155 | 3.287±4.921 | 27.125±5.364 |
|  | Normal vitD | -0.001±0.001 | -0.003±0.022 | 0.112±0.145 | 2.876±4.532 | 26.543±5.278 |
| HbR | Low VitD | -0.001±0.001 | -0.008±0.027 | 0.061±0.086 | 1.876±3.245 | 26.543±5.218 |
|  | Normal vitD | 0.000±0.001 | -0.007±0.026 | 0.058±0.082 | 1.765±3.012 | 25.124±4.896 |
| HbT | Low VitD | -0.001±0.001 | -0.010±0.025 | 0.095±0.111 | 2.581±4.083 | 26.834±5.291 |
|  | Normal vitD | -0.001±0.001 | -0.011±0.026 | 0.088±0.105 | 2.376±3.821 | 25.452±4.987 |
| Left temporal lobe | HbO | Low VitD | -0.001±0.001 | -0.005±0.024 | 0.067±0.084 | 1.765±3.012 | 22.836±4.720 |
|  | Normal vitD | 0.000±0.001 | -0.006±0.025 | 0.055±0.076 | 1.608±2.901 | 22.601±4.645 |
| HbR | Low VitD | 0.000±0.001 | -0.011±0.030 | 0.042±0.068 | 1.452±2.789 | 22.365±4.567 |
|  | Normal vitD | -0.001±0.001 | -0.012±0.031 | 0.038±0.065 | 1.321±2.654 | 21.897±4.432 |
| HbT | Low VitD | -0.001±0.001 | -0.016±0.028 | 0.055±0.076 | 1.608±2.901 | 22.601±4.645 |
|  | Normal vitD | -0.001±0.001 | -0.017±0.029 | 0.049±0.075 | 1.563±2.897 | 22.365±4.567 |
| Left motor area | HbO | Low VitD | 0.001±0.001 | -0.001±0.025 | 0.190±0.239 | 3.895±5.364 | 25.987±5.243 |
|  | Normal vitD | 0.000±0.001 | -0.002±0.024 | 0.148±0.172 | 3.652±5.214 | 25.743±5.056 |
| HbR | Low VitD | -0.001±0.001 | -0.006±0.025 | 0.058±0.079 | 1.789±3.045 | 25.124±4.965 |
|  | Normal vitD | 0.000±0.001 | -0.005±0.024 | 0.098±0.148 | 2.156±3.542 | 26.125±5.132 |
| HbT | Low VitD | 0.000±0.001 | -0.007±0.024 | 0.124±0.159 | 2.842±4.203 | 25.555±5.102 |
|  | Normal vitD | -0.001±0.001 | -0.008±0.025 | 0.105±0.110 | 2.652±4.103 | 25.789±5.014 |

Table Notes: HbO = oxyhemoglobin, HbR = deoxyhemoglobin, HbT = total hemoglobin; Kslope = slope of hemoglobin change, Mean = mean hemoglobin concentration, Peak = peak hemoglobin concentration, Sintegrate = area under the hemoglobin concentration curve, T-Peak = time to peak hemoglobin concentration; Units: Kslope has no unit, Mean and Peak are in μmol/ L , Sintegrate is in μmol·L⁻¹ · s , T -Peak is in s.

**Table S4.** Comparison of brain region activity differences among different vitamin D3 level groups (statistical comparison of fNIRS indices for each brain region based on vitamin D grouping)

| index | brain regions | t value | p value | Cohen's d [95% CI] | logₑ (BF₁₀) | Bayesian factor (BF₁₀) |
| --- | --- | --- | --- | --- | --- | --- |
| HbO-Kslope | right dorsolateral brain | 1.190 | 0.239 | 0.330 [-0.192, 0.850] | 0.714 | ≈2.04 |
|  | Broca's right brain | -0.699 | 0.487 | -0.194 [-0.712, 0.327] | 1.096 | ≈3.0 |
|  | Right frontal pole | 0.236 | 0.814 | 0.066 [-0.448, 0.579] | 1.276 | ≈3.65 |
|  | Right temporal lobe | 0.025 | 0.980 | 0.007 [-0.488, 0.502] | 1.299 | ≈3.67 |
|  | Right brain motor area | 0.523 | 0.603 | 0.120 [-0.481, 0.718] | 1.186 | ≈3.27 |
|  | Left dorsolateral brain | 1.303 | 0.198 | 0.334 [-0.230, 0.894] | 0.598 | ≈1.81 |
|  | Broca's left brain | 0.281 | 0.779 | 0.077 [-0.452, 0.604] | 1.266 | ≈3.55 |
|  | left frontal pole | 0.077 | 0.939 | 0.020 [-0.527, 0.567] | 1.297 | ≈3.66 |
|  | Left temporal lobe | -1.212 | 0.230 | -0.339 [-0.854, 0.180] | 0.692 | ≈2.0 |
|  | Left motor area | 1.319 | 0.192 | 0.374 [-0.138, 0.882] | 0.581 | ≈1.79 |
| HbO-Mean | right dorsolateral brain | 0.237 | 0.813 | 0.063 [-0.474, 0.600] | -1.276 | ≈0.28 |
|  | Broca's right brain | -1.100 | 0.276 | -0.303 [-0.827, 0.224] | -0.798 | ≈0.46 |
|  | Right frontal pole | 0.859 | 0.394 | 0.231 [-0.308, 0.766] | -0.993 | ≈0.37 |
|  | Right temporal lobe | 0.342 | 0.733 | 0.100 [-0.384, 0.584] | -1.250 | ≈0.29 |
|  | Right brain motor area | 0.055 | 0.957 | 0.014 [-0.550, 0.578] | -1.298 | ≈0.27 |
|  | Left dorsolateral brain | 1.204 | 0.233 | 0.346 [-0.157, 0.846] | -0.699 | ≈0.50 |
|  | Broca's left brain | 0.046 | 0.964 | 0.013 [-0.496, 0.522] | -1.298 | ≈0.27 |
|  | left frontal pole | 0.122 | 0.904 | 0.033 [-0.491, 0.558] | -1.293 | ≈0.27 |
|  | Left temporal lobe | -0.738 | 0.463 | -0.186 [-0.750, 0.381] | -1.073 | ≈0.34 |
|  | Left motor area | 0.900 | 0.372 | 0.266 [-0.217, 0.746] | -0.964 | ≈0.38 |
| HbO-Peak | right dorsolateral brain | -1.185 | 0.241 | -0.293 [-0.867, 0.288] | -0.718 | ≈0.48 |
|  | Broca's right brain | -0.648 | 0.519 | -0.169 [-0.718, 0.382] | -1.125 | ≈0.32 |
|  | Right frontal pole | 0.726 | 0.471 | 0.191 [-0.357, 0.736] | -1.081 | ≈0.34 |
|  | Right temporal lobe | 0.519 | 0.605 | 0.148 [-0.355, 0.650] | -1.187 | ≈0.30 |
|  | Right brain motor area | -0.738 | 0.464 | -0.197 [-0.735, 0.343] | -1.073 | ≈0.34 |
|  | Left dorsolateral brain | 0.585 | 0.561 | 0.167 [-0.334, 0.667] | -1.157 | ≈0.31 |
|  | Broca's left brain | -0.052 | 0.959 | -0.014 [-0.546, 0.518] | -1.298 | ≈0.27 |
|  | left frontal pole | -0.407 | 0.685 | -0.108 [-0.647, 0.432] | -1.23 | ≈0.29 |
|  | Left temporal lobe | -0.775 | 0.441 | -0.193 [-0.762, 0.379] | -1.05 | ≈0.35 |
|  | Left motor area | 0.752 | 0.455 | 0.220 [-0.270, 0.707] | -1.064 | ≈0.34 |
| HbO- Sintegrate | right dorsolateral brain | 0.237 | 0.813 | 0.063 [-0.474, 0.600] | -1.276 | ≈0.28 |
|  | Broca's right brain | -1.1 | 0.276 | -0.303 [-0.827, 0.224] | -0.798 | ≈0.46 |
|  | Right frontal pole | 0.859 | 0.394 | 0.231 [-0.308, 0.766] | -0.993 | ≈0.37 |
|  | Right temporal lobe | 0.342 | 0.733 | 0.100 [-0.384, 0.584] | -1.25 | ≈0.29 |
|  | Right brain motor area | 0.055 | 0.957 | 0.014 [-0.550, 0.578] | -1.298 | ≈0.27 |
|  | Left dorsolateral brain | 1.204 | 0.233 | 0.346 [-0.157, 0.846] | -0.699 | ≈0.50 |
|  | Broca's left brain | 0.046 | 0.964 | 0.013 [-0.496, 0.522] | -1.298 | ≈0.27 |
|  | left frontal pole | 0.122 | 0.904 | 0.033 [-0.491, 0.558] | -1.293 | ≈0.27 |
|  | Left temporal lobe | -0.738 | 0.463 | -0.186 [-0.750, 0.381] | -1.073 | ≈0.34 |
|  | Left motor area | 0.9 | 0.372 | 0.266 [-0.217, 0.746] | -0.964 | ≈0.38 |
| HbO-TPeak | right dorsolateral brain | -1.544 | 0.128 | -0.407 [-0.956, 0.148] | -0.317 | ≈0.728 |
|  | Broca's right brain | -0.19 | 0.85 | -0.052 [-0.581, 0.478] | -1.284 | ≈0.277 |
|  | Right frontal pole | 0.863 | 0.392 | 0.238 [-0.286, 0.760] | -0.99 | ≈0.371 |
|  | Right temporal lobe | 1.935 | 0.058 | 0.545 [0.022, 1.062] | 0.234 | ≈1.264 |
|  | Right brain motor area | 0.056 | 0.956 | 0.015 [-0.511, 0.541] | -1.298 | ≈0.273 |
|  | Left dorsolateral brain | 0.572 | 0.57 | 0.146 [-0.414, 0.704] | -1.163 | ≈0.312 |
|  | Broca's left brain | -0.934 | 0.354 | -0.251 [-0.786, 0.287] | -0.938 | ≈0.391 |
|  | left frontal pole | -1.494 | 0.141 | -0.420 [-0.934, 0.098] | -0.38 | ≈0.684 |
|  | Left temporal lobe | 1.397 | 0.168 | 0.392 [-0.127, 0.907] | -0.495 | ≈0.609 |
|  | Left motor area | 0.008 | 0.994 | 0.002 [-0.519, 0.524] | -1.299 | ≈0.272 |
| HbR-Kslope | right dorsolateral brain | -2.081 | **0.042** | -0.566 [-1.104, -0.021] | 0.468 | ≈1.596 |
|  | Broca's right brain | -0.846 | 0.401 | -0.224 [-0.767, 0.323] | -1.002 | ≈0.367 |
|  | Right frontal pole | -0.422 | 0.675 | -0.121 [-0.617, 0.376] | -1.225 | ≈0.293 |
|  | Right temporal lobe | -0.982 | 0.33 | -0.291 [-0.770, 0.192] | -0.899 | ≈0.407 |
|  | Right brain motor area | 0.052 | 0.959 | 0.014 [-0.517, 0.545] | -1.298 | ≈0.273 |
|  | Left dorsolateral brain | -0.797 | 0.429 | -0.193 [-0.773, 0.390] | -1.036 | ≈0.355 |
|  | Broca's left brain | 0.676 | 0.502 | 0.187 [-0.333, 0.705] | -1.11 | ≈0.330 |
|  | left frontal pole | 0.92 | 0.362 | 0.237 [-0.321, 0.792] | -0.949 | ≈0.387 |
|  | Left temporal lobe | 0.484 | 0.63 | 0.135 [-0.379, 0.648] | -1.202 | ≈0.301 |
|  | Left motor area | -0.209 | 0.835 | -0.061 [-0.547, 0.426] | -1.281 | ≈0.277 |
| HbR- Mean | right dorsolateral brain | -2.321 | 0.024 | -0.594 [-1.166, -0.013] | 0.888 | ≈2.43 |
|  | Broca's right brain | -0.933 | 0.355 | -0.247 [-0.789, 0.298] | -0.939 | ≈0.391 |
|  | Right frontal pole | -0.479 | 0.634 | -0.127 [-0.668, 0.416] | -1.204 | ≈0.300 |
|  | Right temporal lobe | -1.076 | 0.286 | -0.314 [-0.803, 0.179] | -0.82 | ≈0.440 |
|  | Right brain motor area | -1.882 | 0.065 | -0.459 [-1.045, 0.135] | 0.151 | ≈1.163 |
|  | Left dorsolateral brain | -0.368 | 0.714 | -0.090 [-0.665, 0.486] | -1.243 | ≈0.288 |
|  | Broca's left brain | 0.33 | 0.742 | 0.092 [-0.428, 0.610] | -1.254 | ≈0.285 |
|  | left frontal pole | -0.321 | 0.75 | -0.091 [-0.596, 0.415] | -1.256 | ≈0.284 |
|  | Left temporal lobe | -0.737 | **0.464** | -0.202 [-0.727, 0.326] | -1.074 | ≈0.342 |
|  | Left motor area | -0.524 | 0.602 | -0.150 [-0.649, 0.350] | -1.185 | ≈0.305 |
| HbR-Peak | right dorsolateral brain | -3.282 | **0.002** | -0.825 [-1.422, -0.215] | 2.964 | ≈19.2 |
|  | Broca's right brain | -0.838 | 0.406 | -0.223 [-0.763, 0.321] | -1.008 | ≈0.365 |
|  | Right frontal pole | -0.883 | 0.381 | -0.243 [-0.766, 0.283] | -0.976 | ≈0.377 |
|  | Right temporal lobe | -0.968 | 0.337 | -0.276 [-0.779, 0.230] | -0.911 | ≈0.402 |
|  | Right brain motor area | -1.969 | 0.054 | -0.471 [-1.065, 0.132] | 0.286 | ≈1.331 |
|  | Left dorsolateral brain | -1.494 | 0.141 | -0.365 [-0.946, 0.222] | -0.38 | ≈0.684 |
|  | Broca's left brain | 0.108 | 0.915 | 0.030 [-0.483, 0.543] | -1.294 | ≈0.274 |
|  | left frontal pole | -0.64 | 0.525 | -0.182 [-0.684, 0.321] | -1.129 | ≈0.323 |
|  | Left temporal lobe | -0.954 | 0.344 | -0.259 [-0.789, 0.275] | -0.922 | ≈0.397 |
|  | Left motor area | -0.635 | 0.528 | -0.180 [-0.686, 0.329] | -1.132 | ≈0.322 |
| HbR-Sintegrate | right dorsolateral brain | -2.321 | **0.024** | -0.594 [-1.166, -0.013] | -0.888 | ≈0.406 |
|  | Broca's right brain | -0.933 | 0.355 | -0.247 [-0.789, 0.298] | 0.939 | ≈2.557 |
|  | Right frontal pole | -0.479 | 0.634 | -0.127 [-0.668, 0.416] | 1.204 | ≈3.335 |
|  | Right temporal lobe | -1.076 | 0.286 | -0.314 [-0.803, 0.179] | 0.82 | ≈2.272 |
|  | Right brain motor area | -1.882 | 0.065 | -0.459 [-1.045, 0.135] | -0.151 | ≈0.860 |
|  | Left dorsolateral brain | -0.368 | 0.714 | -0.090 [-0.665, 0.486] | 1.243 | ≈3.465 |
|  | Broca's left brain | 0.33 | 0.742 | 0.092 [-0.428, 0.610] | 1.254 | ≈3.507 |
|  | left frontal pole | -0.321 | 0.75 | -0.091 [-0.596, 0.415] | 1.256 | ≈3.518 |
|  | Left temporal lobe | -0.737 | **0.464** | -0.202 [-0.727, 0.326] | 1.074 | ≈2.928 |
|  | Left motor area | -0.524 | 0.602 | -0.150 [-0.649, 0.350] | 1.185 | ≈3.270 |
| HbR-TPeak | right dorsolateral brain | -1.994 | 0.051 | -0.529 [-1.079, 0.028] | 0.326 | ≈1.386 |
|  | Broca's right brain | -0.838 | 0.406 | -0.223 [-0.763, 0.321] | -1.008 | ≈0.365 |
|  | Right frontal pole | -0.479 | 0.634 | -0.127 [-0.668, 0.416] | -1.204 | ≈0.300 |
|  | Right temporal lobe | -0.968 | 0.337 | -0.276 [-0.779, 0.230] | -0.911 | ≈0.402 |
|  | Right brain motor area | -1.969 | 0.054 | -0.471 [-1.065, 0.132] | 0.286 | ≈1.331 |
|  | Left dorsolateral brain | -0.368 | 0.714 | -0.090 [-0.665, 0.486] | -1.243 | ≈0.288 |
|  | Broca's left brain | 0.25 | 0.804 | 0.065 [-0.486, 0.615] | -1.273 | ≈0.279 |
|  | left frontal pole | -0.426 | 0.671 | -0.114 [-0.652, 0.426] | -1.224 | ≈0.294 |
|  | Left temporal lobe | -0.634 | 0.529 | -0.170 [-0.705, 0.368] | -1.132 | ≈0.322 |
|  | Left motor area | 0.422 | 0.675 | 0.119 [-0.389, 0.626] | -1.225 | ≈0.294 |
| HbT-Kslope | right dorsolateral brain | -0.092 | 0.927 | -0.026 [-0.530, 0.478] | 1.296 | ≈3.65 |
|  | Broca's right brain | -1.037 | 0.304 | -0.296 [-0.799, 0.210] | 0.854 | ≈2.35 |
|  | Right frontal pole | 0.011 | 0.991 | 0.003 [-0.502, 0.508] | 1.299 | ≈3.69 |
|  | Right temporal lobe | -0.444 | 0.659 | -0.135 [-0.595, 0.327] | 1.217 | ≈3.38 |
|  | Right brain motor area | 0.548 | 0.586 | 0.125 [-0.476, 0.724] | 1.175 | ≈3.24 |
|  | Left dorsolateral brain | 0.96 | 0.341 | 0.252 [-0.298, 0.799] | 0.917 | ≈2.50 |
|  | Broca's left brain | 0.897 | 0.374 | 0.238 [-0.305, 0.779] | 0.966 | ≈2.63 |
|  | left frontal pole | 0.574 | 0.568 | 0.151 [-0.397, 0.696] | 1.162 | ≈3.19 |
|  | Left temporal lobe | -1.102 | 0.275 | -0.309 [-0.823, 0.208] | 0.797 | ≈2.22 |
|  | Left motor area | 1.507 | 0.137 | 0.405 [-0.138, 0.944] | 0.363 | ≈1.44 |
| HbT- Mean | right dorsolateral brain | -0.956 | 0.343 | -0.256 [-0.794, 0.286] | 0.92 | ≈2.51 |
|  | Broca's right brain | -1.62 | 0.111 | -0.474 [-0.965, 0.020] | 0.22 | ≈1.25 |
|  | Right frontal pole | 0.607 | 0.546 | 0.172 [-0.333, 0.676] | 1.146 | ≈3.15 |
|  | Right temporal lobe | -0.302 | 0.764 | -0.090 [-0.561, 0.382] | 1.261 | ≈3.53 |
|  | Right brain motor area | -1.043 | 0.301 | -0.264 [-0.827, 0.304] | 0.849 | ≈2.34 |
|  | Left dorsolateral brain | 0.887 | 0.379 | 0.256 [-0.240, 0.750] | 0.973 | ≈2.65 |
|  | Broca's left brain | 0.378 | 0.707 | 0.108 [-0.396, 0.610] | 1.24 | ≈3.45 |
|  | left frontal pole | -0.044 | 0.965 | -0.012 [-0.527, 0.502] | 1.298 | ≈3.66 |
|  | Left temporal lobe | -1.04 | 0.303 | -0.252 [-0.833, 0.335] | 0.851 | ≈2.34 |
|  | Left motor area | 0.82 | 0.416 | 0.236 [-0.261, 0.732] | 1.021 | ≈2.78 |
| HbT-Peak | right dorsolateral brain | -2.268 | **0.027** | -0.550 [-1.144, 0.053] | -0.793 | ≈0.453 |
|  | Broca's right brain | -1.236 | 0.222 | -0.342 [-0.864, 0.183] | 0.668 | ≈1.95 |
|  | Right frontal pole | 0.169 | 0.866 | 0.047 [-0.468, 0.562] | 1.287 | ≈3.62 |
|  | Right temporal lobe | -0.12 | 0.905 | -0.034 [-0.532, 0.464] | 1.293 | ≈3.64 |
|  | Right brain motor area | -1.732 | 0.089 | -0.431 [-1.007, 0.153] | 0.068 | ≈1.07 |
|  | Left dorsolateral brain | 0.239 | 0.812 | 0.068 [-0.432, 0.568] | 1.275 | ≈3.58 |
|  | Broca's left brain | 0.006 | 0.996 | 0.002 [-0.517, 0.520] | 1.299 | ≈3.66 |
|  | left frontal pole | 0.12 | 0.905 | 0.035 [-0.446, 0.517] | 1.293 | ≈3.64 |
|  | Left temporal lobe | -1.062 | 0.293 | -0.257 [-0.838, 0.330] | 0.832 | ≈2.30 |
|  | Left motor area | -0.474 | 0.637 | -0.125 [-0.667, 0.418] | 1.206 | ≈3.34 |
| HbT-Sintegrate | right dorsolateral brain | -0.956 | 0.343 | -0.256 [-0.794, 0.286] | 0.92 | ≈2.51 |
|  | Broca's right brain | -1.62 | 0.111 | -0.474 [-0.965, 0.020] | 0.22 | ≈1.25 |
|  | Right frontal pole | 0.607 | 0.546 | 0.172 [-0.333, 0.676] | 1.146 | ≈3.15 |
|  | Right temporal lobe | -0.302 | 0.764 | -0.090 [-0.561, 0.382] | 1.261 | ≈3.53 |
|  | Right brain motor area | -1.043 | 0.301 | -0.264 [-0.827, 0.304] | 0.849 | ≈2.34 |
|  | Left dorsolateral brain | 0.887 | 0.379 | 0.256 [-0.240, 0.750] | 0.973 | ≈2.65 |
|  | Broca's left brain | 0.378 | 0.707 | 0.108 [-0.396, 0.610] | 1.24 | ≈3.45 |
|  | left frontal pole | -0.044 | 0.965 | -0.012 [-0.527, 0.502] | 1.298 | ≈3.66 |
|  | Left temporal lobe | -1.04 | 0.303 | -0.252 [-0.833, 0.335] | 0.851 | ≈2.34 |
|  | Left motor area | 0.82 | 0.416 | 0.236 [-0.261, 0.732] | 1.021 | ≈2.78 |
| HbT-TPeak | right dorsolateral brain | 1.992 | 0.051 | 0.545 [0.005, 1.079] | -0.322 | ≈0.719 |
|  | Broca's right brain | -1.712 | 0.092 | -0.451 [-1.002, 0.107] | 0.095 | ≈1.10 |
|  | Right frontal pole | 1.314 | 0.194 | 0.361 [-0.168, 0.887] | 0.587 | ≈1.80 |
|  | Right temporal lobe | 1.503 | 0.138 | 0.419 [-0.105, 0.938] | 0.369 | ≈1.45 |
|  | Right brain motor area | -0.834 | 0.408 | -0.230 [-0.751, 0.293] | 1.011 | ≈2.75 |
|  | Left dorsolateral brain | 1.152 | 0.254 | 0.300 [-0.257, 0.852] | 0.75 | ≈2.12 |
|  | Broca's left brain | -1.126 | 0.265 | -0.307 [-0.836, 0.225] | 0.774 | ≈2.17 |
|  | left frontal pole | -0.909 | 0.367 | -0.249 [-0.775, 0.280] | 0.957 | ≈2.60 |
|  | Left temporal lobe | -0.391 | 0.697 | -0.108 [-0.626, 0.410] | 1.236 | ≈3.45 |
|  | Left motor area | -0.317 | 0.753 | -0.088 [-0.606, 0.432] | 1.257 | ≈3.51 |
